# Supplementary material for: A quantitative LumiFluo assay to test inhibitory compounds blocking p53 degradation induced by human papillomavirus oncoprotein E6 in living cells
Source: PubMed Central journal article supplement (PMC5902497; doi:10.1038/s41598-018-24470-4), 2018-04-16
Supplement: 41598_2018_24470_MOESM1_ESM.pdf [file 41598_2018_24470_MOESM1_ESM.pdf]

**A quantitative *LumiFluo* assay to test inhibitory compounds blocking p53 degradation induced by human papillomavirus oncoprotein E6 in living cells**

Lorenzo Messa, Marta Celegato, Chiara Bertagnin, Beatrice Mercorelli, Giulio Nannetti, Giorgio Palù & Arianna Loregian

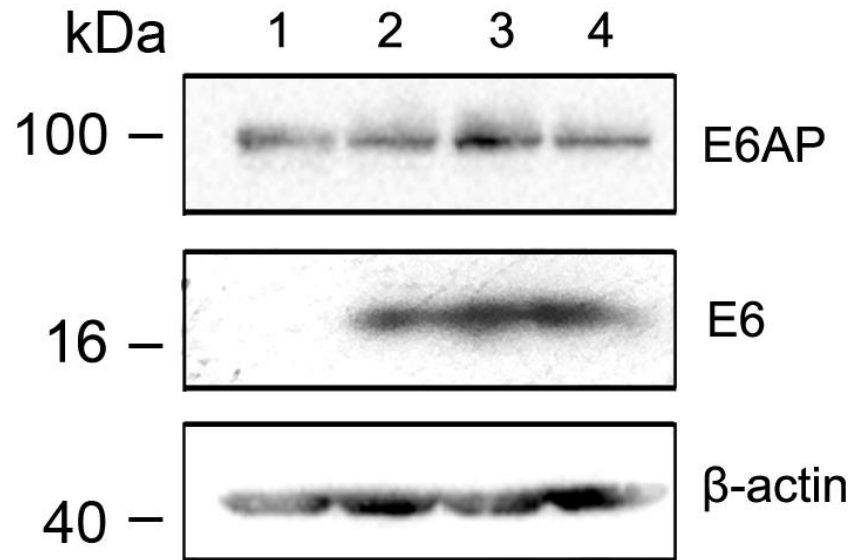

**Supplementary Figure 1. Effect of SAHA treatment on the intracellular levels of E6 and E6AP.** Western blot analysis of H1299 cells cotransfected with pcDNA3.1-EF-1 $\alpha$ -GFP and pcDNA3-Rluc-p53 plasmids along with p513 empty vector (1) or p513-E6<sup>DM</sup> (2-4). Transfected cells were treated with DMSO (1-2), SAHA 2  $\mu$ M (3), or SAHA 5  $\mu$ M (4) for 24 hours.  $\beta$ -actin was used as a loading control.

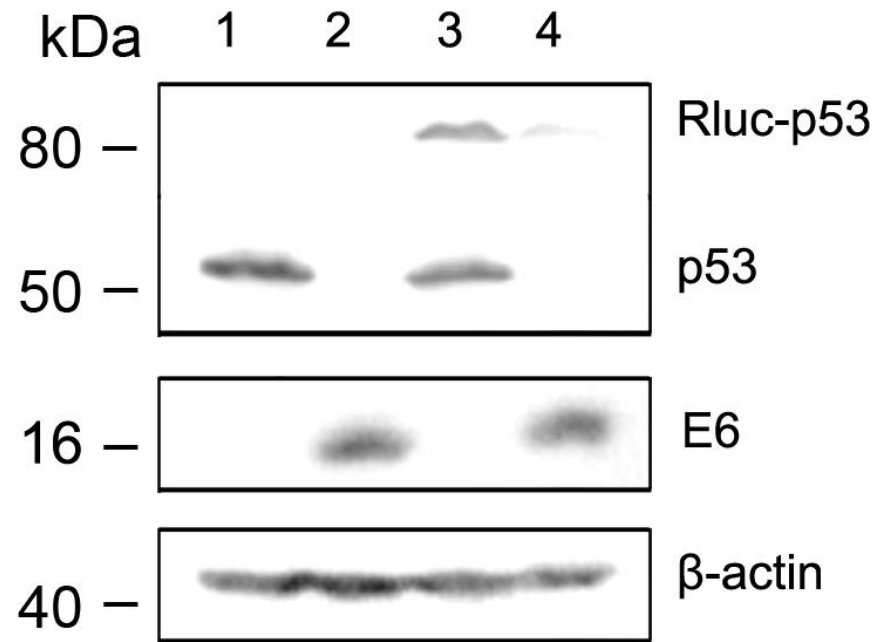

**Supplementary Figure 2. HPV16 E6 can concomitantly target endogenous p53 and ectopically expressed Rluc-p53 to degradation.** Western blot analysis of C33A cells transfected with p513 empty vector (1), p513-E6<sup>DM</sup> (2), pcDNA3-Rluc-p53 (3) or cotransfected with p513-E6<sup>DM</sup> and pcDNA3-Rluc-p53 (4).  $\beta$ -actin was used as a loading control.
